# Supplementary material for: Exosome-Based Multivalent Vaccine: Achieving Potent Immunization, Broadened Reactivity, and Strong T-Cell Responses with Nanograms of Proteins
Source: PubMed Central journal article supplement (PMC10269692; doi:10.1128/spectrum.00503-23), 2023-04-24
Supplement: spectrum.00503-23-s0001.pdf [file spectrum.00503-23-s0001.pdf]

## Supplementary Figures

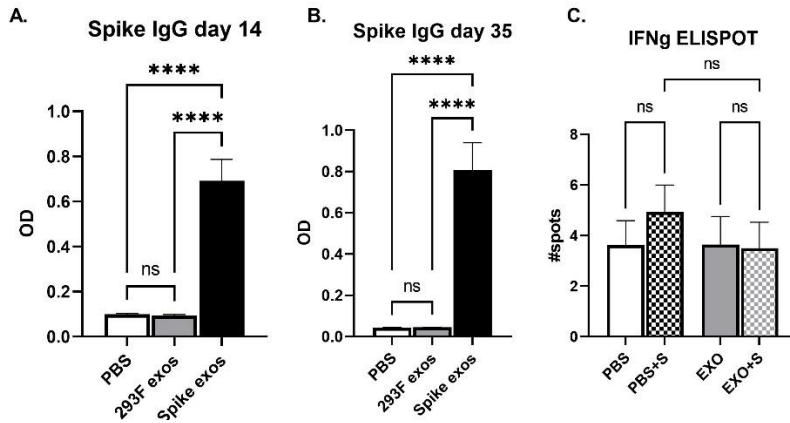

**Supplementary Figure 1. Immune response to 293F exosome is comparable to PBS control.** **A.** ELISA at day 14 after first injection. **B.** ELISA at day 35 after booster injection (2 injections) **C.** IFN $\gamma$  response to PBS and exosome at day 35. Data are shown as mean  $\pm$  SEM. \*\*\*\*  $p < 0.001$ , ns= not significant, 1-way ANOVA, adjusted for multiple comparison.

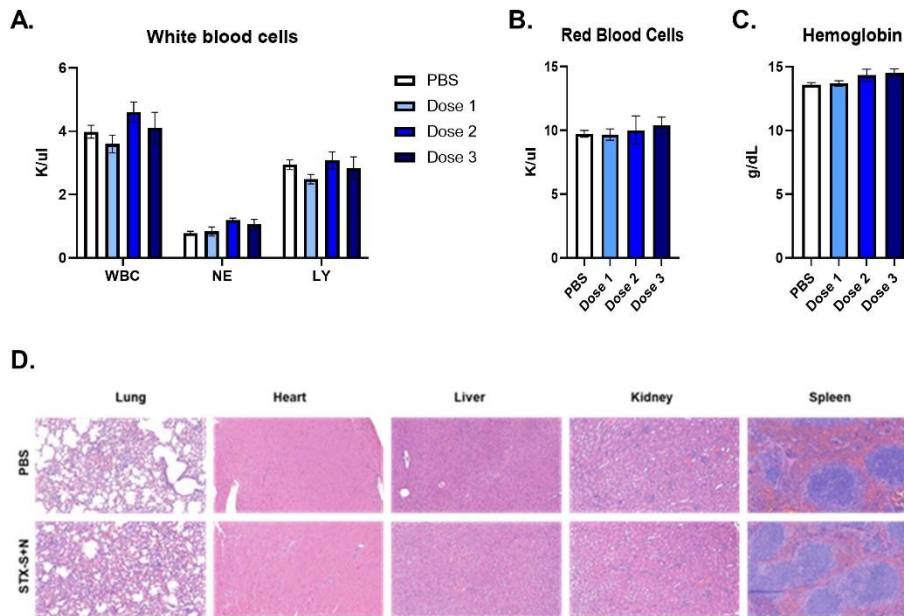

**Supplementary Figure 2. No adverse effects after STX-S+N administration in mouse.** **A-C.** Complete blood count at terminal collection. **D.** Representative images of H&E. All tissues were imaged at the same magnification. Scale bar= 100 $\mu$ m. WBC= white blood cells; NE=neutrophils; LY= lymphocytes; RBC= red blood cells; Hb= hemoglobin; SKM= skeletal muscle. Data are shown as mean $\pm$ SE. N=10 animals per experimental group.

**Table S1. Analysis of exosomes by NTA.**

| <b>Exosome Type</b> | <b>Samples</b> | <b>Diameter (nm)</b> | <b>Mean Diameter (nm)</b> | <b>PDI</b> | <b>Mean PDI</b> |
|---------------------|----------------|----------------------|---------------------------|------------|-----------------|
| STX-S               | 1              | 140.6                | 144.8                     | 0.142      | 0.151           |
|                     | 2              | 143.9                |                           | 0.142      |                 |
|                     | 3              | 149.8                |                           | 0.168      |                 |
| STX-N               | 1              | 142.4                | 140.1                     | 0.126      | 0.128           |
|                     | 2              | 139.3                |                           | 0.137      |                 |
|                     | 3              | 138.5                |                           | 0.122      |                 |
| 293F                | 1              | 132.6                | 133.5                     | 0.119      | 0.115           |
|                     | 2              | 131.1                |                           | 0.115      |                 |
|                     | 3              | 136.7                |                           | 0.112      |                 |

**Table S2. Analysis of CD81 expression on exosomes by bead-based assay.**

| <b>Exosome Tested</b> | <b>Sample #</b> | <b>Average CD81 Signal (%)</b> | <b>Standard Deviation</b> |
|-----------------------|-----------------|--------------------------------|---------------------------|
| STX-S                 | 1               | 98.0                           | 0.49                      |
|                       | 2               | 98.5                           | 0.42                      |
|                       | 3               | 97.6                           | 1.20                      |
| STX-N                 | 1               | 99.1                           | 0.35                      |
|                       | 2               | 97.4                           | 0.21                      |
|                       | 3               | 97.4                           | 1.13                      |
| 293F                  | 1               | 96.75                          | 0.49                      |
|                       | 2               | 97.8                           | 0.85                      |
|                       | 3               | 96.15                          | 0.07                      |

**Table S3. Rabbit Pathology Summary**

| <b>Treatment</b> | <b>Mouse</b> | <b>Organ Macroscopic Observation Microscopic Observation</b> |
|------------------|--------------|--------------------------------------------------------------|
| <b>PBS</b>       | 1            | No abnormal observations.                                    |
|                  | 2            | No abnormal observations.                                    |
|                  | 3            | No abnormal observations.                                    |
|                  | 4            | No abnormal observations.                                    |
|                  | 5            | No abnormal observations.                                    |
|                  | 6            | No abnormal observations.                                    |
|                  | 7            | No abnormal observations.                                    |
|                  | 8            | No abnormal observations.                                    |
| <b>Dose 1</b>    | 1            | No abnormal observations.                                    |
|                  | 2            | No abnormal observations.                                    |
|                  | 3            | No abnormal observations.                                    |
|                  | 4            | No abnormal observations.                                    |
|                  | 5            | No abnormal observations.                                    |
|                  | 6            | No abnormal observations.                                    |
|                  | 7            | No abnormal observations.                                    |
|                  | 8            | Multifocal cyst, in the limit of background alteration       |
| <b>Dose 2</b>    | 1            | No abnormal observations.                                    |
|                  | 2            | No abnormal observations.                                    |
|                  | 3            | No abnormal observations.                                    |
|                  | 4            | No abnormal observations.                                    |
|                  | 5            | No abnormal observations.                                    |
|                  | 6            | No abnormal observations.                                    |
|                  | 7            | No abnormal observations.                                    |
|                  | 8            | No abnormal observations.                                    |
